# Supplementary material
Source: HighWire-hosted journal article supplement (https://bmjopen.bmj.com/content/9/3/e023908)
Supplement: inline-supplementary-material-1 [file inline-supplementary-material-1.pdf]

**Supplemental table 1.** Multivariate analyses of clinical features affecting overall survival after liver transplantation.

| Factors                                              | Multivariate analysis |                         |                |
|------------------------------------------------------|-----------------------|-------------------------|----------------|
|                                                      | Hazard Ratio          | 95% Confidence Interval | <i>p</i> value |
| Age (years)                                          |                       |                         |                |
| ≤55 <i>versus</i> >55                                | 0.99                  | 0.63 – 1.56             | 0.974          |
| Gender                                               |                       |                         |                |
| Male <i>versus</i> Female                            | 1.17                  | 0.74 – 1.85             | 0.512          |
| Hepatitis virus                                      |                       |                         |                |
| Hepatitis B positive                                 | 0.76                  | 0.45 – 1.29             | 0.307          |
| Hepatitis C positive                                 | 1.27                  | 0.70 – 2.30             | 0.427          |
| Hepatitis B, C positive                              | 0.48                  | 0.14 – 1.63             | 0.240          |
| Comorbidity                                          |                       |                         |                |
| Yes <i>versus</i> No                                 | 1.29                  | 0.71 – 2.35             | 0.406          |
| Graft type                                           |                       |                         |                |
| Whole liver <i>versus</i> partial liver              | 1.56                  | 1.01 – 2.40             | 0.043          |
| Bacterial cultures of donor                          |                       |                         |                |
| Positive <i>versus</i> Negative                      | 0.80                  | 0.52 – 1.23             | 0.310          |
| MELD score                                           |                       |                         |                |
| > 20 <i>versus</i> ≤ 20                              | 1.01                  | 0.99 – 1.04             | 0.132          |
| Blood cultures after liver transplantation (30 days) |                       |                         |                |
| Positive <i>versus</i> Negative                      | 1.52                  | 0.85 – 2.74             | 0.160          |

MELD: model for end-stage liver disease
